1 DNA methylation analysis of amplicons from individuals exposed to maternal  
2 tobacco use during pregnancy, and offspring conduct problems in childhood and  
3 adolescence

4

5 Alexandra J. Noble<sup>1</sup>, John F. Pearson<sup>2</sup>, Alasdair D. Noble<sup>3</sup> Joseph M. Boden<sup>4</sup>, L.  
6 John Horwood<sup>4</sup>, Martin A. Kennedy<sup>2</sup>, Amy J. Osborne<sup>1</sup>

7

8

9 <sup>1</sup>School of Biological Sciences, University of Canterbury, Christchurch, New Zealand

10 <sup>2</sup>Department of Pathology and Biomedical Sciences, University of Otago,  
11 Christchurch, New Zealand

12 <sup>3</sup>AgResearch, Lincoln Research Centre, Christchurch, New Zealand

13 <sup>4</sup>Department of Psychological Medicine, University of Otago, Christchurch, New  
14 Zealand

15

16

17

18

19

20

21

22

23

24

25

26

27

28

29

30 Abstract

31 Maternal tobacco smoking during pregnancy is a large driver of health inequalities  
32 and a higher prevalence of conduct problem has been observed in exposed  
33 offspring. Further, maternal tobacco use during pregnancy can also alter offspring  
34 DNA methylation. However, currently, limited molecular evidence have been found to  
35 support this observation. Thus we aim to examine the association between maternal  
36 tobacco use in pregnancy and whether offspring Conduct problems is mediated by  
37 tobacco exposure-induced via DNA methylation differences. Understanding the  
38 etiology of the causal link will be crucial in the early identification and treatment of  
39 CP in children and adolescents. DNA was sourced from the Christchurch Health and  
40 Development Study, a longitudinal birth cohort studied for over 40 years in New  
41 Zealand. Bisulfite-based amplicon sequencing of 10 loci known to play a role in  
42 neurodevelopment, or with associations with CP phenotypes, was undertaken. We  
43 identified nominally significant differential DNA methylation at specific CpG sites in  
44 *CYP1A1*, *ASH2L* and *MEF2C* in individuals with Conduct problems who were  
45 exposed to tobacco *in utero*. We conclude that environmentally-induced DNA  
46 methylation differences could play a role in the observed link between maternal  
47 tobacco use during pregnancy and childhood/adolescent Conduct problems  
48 However, larger sample sizes are needed to produce an adequate amount of power  
49 to investigate this interaction further.

## 50 **Introduction**

51

52 Mothers who smoked tobacco during pregnancy have a higher prevalence of  
53 offspring developing a conduct disorder phenotype compared to mothers who did not  
54 smoke (Wakschlag et al. 1997). This association has been proven in several  
55 different cohort studies and the observation have remained following adjustment for  
56 various other confounding factors, for example, socio economic status, maternal  
57 age, substance abuse, parental anti-social personality, and maladaptive parenting  
58 (Wakschlag et al. 1997; Joelsson et al. 2016). However, there is limited molecular  
59 evidence to suggest a link between *in utero* tobacco exposure and offspring conduct  
60 disorder, thus a direct link between *in utero* tobacco exposure and Conduct problems  
61 (CP) remains elusive. Previously we conducted a pilot study assessing differential  
62 DNA methylation in a small cohort of individuals who were exposed to tobacco *in*  
63 *utero*, with sub-groups of individuals defined as having high conduct disorder scores  
64 (Noble et al. 2021). We found nominally significant DNA methylation changes with  
65 this interaction in several genes associated with neurodevelopment (cite epic in utero  
66 paper). Due to the limitations of using a small sample size combined with an array  
67 containing a large number of loci, results were underpowered, therefore observations  
68 were unable to reach genome wide significance. However, the biological relevance  
69 of these nominally significant CpG loci to the CP phenotype, combined with further  
70 research which has suggested an epigenetic link between *in utero* tobacco exposure  
71 and ADHD (Sengupta et al. 2017), implies that the link between DNA methylation  
72 and CP development in tobacco-exposed offspring should be investigated more fully.

73

74 Here, we will further pursue this hypothesis, by exploring differential methylation in  
75 genes that have known roles during *in utero* neurodevelopment and CP phenotypes,  
76 to understand whether DNA methylation may help explain the relationship between  
77 *in utero* tobacco exposure and development of CP in offspring. We applied a  
78 targeted approach via bisulfite-based amplicon sequencing (BSAS) of regions of  
79 genes involved in neurodevelopment. Amplicon sequencing has the ability to  
80 interrogate a region of the genome, therefore specifically targeting consecutive CpG  
81 sites in a row. We then assessed differential methylation in the DNA of participants  
82 from the Christchurch Health and Development Study (CHDS) whose mothers  
83 consumed tobacco during pregnancy, with high and low CP scores, and compared

84 this to controls who were not exposed. This approach allows us to specifically ask  
85 whether DNA methylation at genes involved in neurodevelopment and CP  
86 phenotypes are specifically differentially methylated in the DNA of offspring with CP,  
87 who were exposed to tobacco *in utero*. A significant interaction here would provide  
88 further support for a role for DNA methylation in the link between *in utero* exposure  
89 and CP development, something which has so far proved elusive.

90

91

## 92 **Methods**

### 93 **Sample**

94 A sub-group of individuals from the CHDS were selected for this study (Table 1).  
95 This longitudinal study originally included 97% of all the children (N= 1265) born in  
96 the Christchurch, New Zealand urban region during a period in mid-1977 and has  
97 been studied at 24 time points from birth to age 40 (N= 987 at age 30). All  
98 participants were aged between 28-30 when blood samples and DNA was extracted.

99 For the subsets studied in this report, CHDS participants were chosen based on their  
100 *in utero* tobacco exposure status, their adult smoking status, and their CP scores.  
101 Group 1 consisted of individuals who were exposed *in utero* to tobacco smoke, and  
102 never smokers at the time blood samples were taken (N= 32). Group 2 consisted of  
103 individuals who were exposed *in utero* to tobacco smoke and were themselves  
104 regular smokers at the time the blood was taken (N= 32). Group 3 consisted of  
105 individuals who were not exposed to tobacco *in utero*, and never smokers at the time  
106 blood was taken (N= 32). *In utero* tobacco exposure was defined as 10+ cigarettes  
107 per day throughout pregnancy. Within each group of 32, 16 individuals were selected  
108 with a 'high' score on a measure of childhood CP at age 7-9 years and 16 with a  
109 'low' score. Severity of childhood CP was assessed using an instrument that  
110 combined selected items from the Rutter and Conners child behaviour checklists  
111 (Rutter M 1970; Conners 1970, 1969; Fergusson, Horwood, and Lloyd 1991) as  
112 completed by parents and teachers at annual intervals from 7-9 years. Parental and  
113 teacher reports were summed and averaged over the three years (Fergusson,  
114 Horwood, and Ridder 2005) to derive a robust scale measure of the extent to which  
115 the child exhibited conduct disordered/oppositional behaviours (mean (SD)=

116 50.1(7.9) ; range 41-97). For the purposes of this report a 'high' score was defined  
117 as falling into the top quartile of the score distribution (scores >53) and a 'low' score  
118 was defined as scores < 46.

119

## 120 **Bisulfite-based amplicon sequencing**

121 Bisulfite-based amplicon sequencing (BSAS) was carried out as described (Noble et  
122 al. 2020). DNA was extracted from whole blood samples using the Kingfisher Flex  
123 System (Thermo Scientific, Waltham, MA USA). DNA was quantified via nanodrop  
124 (Thermo Scientific, Waltham, MA USA). Bisulfite treatment was carried out using the  
125 EZ DNA Methylation-Gold kit (Zymo Research, Irvine, CA, USA) as per the  
126 manufacturer's instructions. DNA samples were then diluted to a final concentration  
127 of 100 ng/μl.

128 Amplicons for sequencing (Table 2 and Supplementary Table 1) were picked based  
129 upon several criteria: i) previously published differential DNA methylation in response  
130 to *in utero* tobacco smoking; ii) known associations with *in utero* brain development,  
131 and; iii) known associations with CP phenotypes. Primers were then designed to  
132 flank the CpG sites of interest, ~350 base pairs (bp) in total, or to amplify the  
133 promoter region of the gene if a specific CpG site was not known. Multiple pairs of  
134 primers were designed to amplify larger regions.

135 Bisulfite-converted DNA was amplified via PCR, using KAPA Taq HotStart DNA  
136 Polymerase (Sigma, Aldrich) under the following conditions: 95 °C for 10 min, 95 °C  
137 for 30 sec, 59 °C for 20 sec, 72 °C for 7 min, and held at 4 C° using the Mastercycler  
138 Nexus (Eppendorf, Australia). This was then cycled a total of 40 times. PCR  
139 products were purified with the Zymo DNA Clean & Concentrator Kit™ (Zymo  
140 Research, Irvine, CA, USA).

141 Following PCR, DNA was cleaned up with Agencourt® AMPure® XP beads  
142 (Beckman Coulter) and washed with 80% ethanol and allowed to air-dry. DNA was  
143 then eluted with 52.5 μl of 10 mM Tris pH 8.5 before being placed back into the  
144 magnetic stand. Once the supernatant had cleared, 50 μl was aliquoted for the  
145 experiment. DNA samples were quantified using the Quant-iT™ PicoGreen™  
146 dsDNA Assay kit (Thermo Fisher) using the FLUROstar® Omega (BMG Labtech).

147 Samples were processed using the Illumina MiSeq™ 500 cycle Kit V2 and  
148 sequenced on the Illumina MiSeq™ system by Massey Genome Service  
149 (Palmerston North). Illumina MiSeq™ sequences were trimmed using SolexaQA++  
150 software (Cox, Peterson, and Biggs 2010) and aligned to FASTA bisulfite converted  
151 reference sequences using the package Bowtie2 (version 2.3.4.3) Each individual  
152 read was then aligned to all reference sequences using the methylation-specific  
153 package Bismark (Krueger and Andrews 2011).

154

## 155 **Statistics**

156 Differential DNA methylation was assessed using the package edgeR (Chen et al.).  
157 Coverage level was set to greater or equal to “8” across unmethylated and  
158 methylated counts, as recommended by (Chen et al.). Two models were used – the  
159 first was a bivariate model, to assess differences between the *in utero* exposed to  
160 tobacco compared to the non-exposed control group (model 1).

$$Y \sim U + AS + e$$

161 The second was a multiple regression to assess the interaction term *in utero*  
162 maternal smoke exposure and offspring conduct problem score (high or low, model  
163 2).

$$Y \sim U + C + AS + U:C + e$$

164 Where,  $Y$  is defined as the methylation M ratio,  $U$  is the exposed/unexposed *in utero*  
165 to maternal smoking,  $C$  is conduct problem score with high conduct problem score <  
166 53 and low conduct problem core < 46,  $AS$  adult smoker/non-smoker and  $e$  is the  
167 unexplained variation or error tem.

168 This model was fitted with both ANOVA parameters and with contrasts between *in*  
169 *utero* exposure groups (exposed – non-exposed) within CP score levels. Top tables  
170 were constructed using the topTags function in edgeR, Log fold change, average log  
171 counts per million, and in some cases F statistic and were calculated and nominal  
172 significance was given for  $P < 0.05$ , these were then corrected using FDR. Scatter  
173 plots with the inclusion of confidence intervals were constructed from log  
174 transformed normalised methylated and unmethylated counts.

175

## 176 **Results**

177

178 Here we assessed DNA methylation within 10 separate genes (Table 2). DNA  
179 sequence data for 15 amplicons from these 10 genes (Supplementary Table 1) was  
180 generated, comprising a total of 280 CpG sites. These CpG sites included a  
181 combination of sites previously identified as differentially methylated, as well as  
182 amplification of all CpGs within the promoter region of genes associated with *in utero*  
183 neurodevelopment and CP phenotypes (Table 2). Differential methylation across  
184 these CpG sites was calculated to address whether any were specifically  
185 differentially methylated in individuals with CP, in response to *in utero* tobacco  
186 exposure.

187

### 188 **Quantification of DNA methylation at previously reported CpG sites in** 189 **response to *in utero* exposure to tobacco**

190 Initially, we attempted to validate in our cohort (age ~28-30 years) five CpG sites  
191 which have been previously reported to be differentially methylated in the DNA of  
192 cord blood from newborns, and whole blood from children and adolescents (ages  
193 newborn to 17) in response to *in utero* tobacco exposure (Table 1). Data were  
194 partitioned into those individuals exposed *in utero*, and those who were not (model  
195 1), to assess whether or not BSAS could detect previously reported CpG sites (Table  
196 3).

197 *AHRR* (cg05575921) displayed a 3.1% decrease in DNA methylation between  
198 exposed and non-exposed individuals, at a nominal P value of 0.02. This site has  
199 been previously identified as hypomethylated in adult tobacco smokers, as well as in  
200 postnatal cord blood samples between *in utero* tobacco-exposed and non-exposed  
201 individuals. The probe cg05549655 in the gene *CYP1A1* displayed a 5.19% increase  
202 in DNA methylation in the *in utero* exposed group, however, this site did not reach  
203 nominal statistical significance in our cohort. Cg09935388 and cg09662411 in *GFI1*  
204 were unable to be replicated as differentially methylated between the exposed and  
205 the non-exposed groups (no significant change in  $\beta$  values). Both CpG sites show

206 hypomethylation, supporting previous observations of differential methylation within  
207 this gene. *CNTNAP2* (cg2594950) was similarly unable to be validated in our cohort  
208 using the method BSAS.

209

210

211

## 212 **Differentially methylated CpGs under the interaction of *in utero* tobacco** 213 **exposure and CP**

214 Differential methylation dependent on both *in utero* exposure and CP score was  
215 found at 10 loci in six genes at nominal significance level, none were significant after  
216 correcting for false discovery rate (Table 4).

217 Of these CpG sites, five of the 10 CpG sites were found in the following genes:  
218 *CYP1A1*, *GFI1*, *ASH2L* and *GRIN2b*. Differential methylation between *in utero*  
219 exposed and non-exposed associated with for high conduct scores. No nominal  
220 significance from the interaction observed in association with low conduct scores.  
221 The top three CpG sites with nominal significance under the interaction are displayed  
222 in Figure 1. Here, differential methylation is found in response to high CP score and  
223 no differences are seen between the exposed and non-exposed low CP groups  
224 (Figure 1).

225

## 226 **Discussion**

227 *In utero* tobacco exposure is known to alter DNA methylation at the genome-wide  
228 level in offspring (Joubert, Haberg, et al. 2012; Joubert, Felix, Yousefi, Bakulski,  
229 Just, Breton, Reese, Markunas, Richmond, Xu, et al. 2016) (Joubert Bonnie et al.  
230 2012; Richmond et al. 2014). The later-life implications of these tobacco-induced  
231 DNA methylation changes are unclear, however, an association between *in utero*  
232 tobacco exposure and CP has previously been observed (Sengupta et al. 2017).  
233 Given the complex etiology of CP phenotypes (Acosta, Arcos-Burgos, and Muenke  
234 2004; Beaver et al. 2007; Salvatore and Dick 2018) and the vast array of  
235 socioeconomic variables associated with tobacco use (Lantz et al. 1998), proving a

236 causal link between maternal smoking and offspring CP is inherently challenging.  
237 Previously we quantified tobacco-induced DNA methylation changes that associate  
238 with CP phenotypes in offspring exposed to tobacco *in utero* (via maternal smoking)  
239 using the Illumina EPIC array, with results indicating that methylation was altered at  
240 genes that may have roles in neurodevelopment and CP phenotypes. However, due  
241 to a combination of a comparatively small sample size relative to the number of loci  
242 on the array, only nominal significance was observed. The data suggested a role for  
243 DNA methylation in the link between exposure and CP, so here we chose a panel of  
244 genes with known roles in these things, to see if methylation is changed at these loci  
245 too. Due to our small sample size we need to try an alternative approach. We've  
246 shown that BSAS previously is very good for targeting differential methylated so here  
247 we use BSAS at some targeted genes to see if we can detect differential methylation  
248 specific to the interaction between high CP score and exposure?

249 **Validation of previously identified differentially methylated CpG from *in utero***  
250 **tobacco exposure**

251 First, we asked whether differentially methylated CpGs that have been previously  
252 associated with *in utero* tobacco exposure were supported by this cohort. Here, we  
253 present validation of differential methylation of a CpG site within the gene *AHRR*  
254 (cg05575921). *AHRR* is a well-defined tobacco smoking gene, which is consistently  
255 represented in tobacco methylation data. *AHRR* has previously been found to be  
256 differentially methylated in response to *in utero* tobacco exposure (Richmond,  
257 Simpkin, Woodward, Gaunt, Lyttleton, McArdle, Ring, Smith, Timpson, Tilling, Davey  
258 Smith, et al. 2015; Joubert, Håberg, Nilsen, Wang, Vollset, Murphy, Huang, Hoyo,  
259 Midttun, Cupul-Uicab, et al. 2012; de Vocht et al. 2015). Four other CpG sites  
260 investigated here due to previous association with *in utero* tobacco exposure were  
261 not differentially methylated in our data. However, the direction of methylation  
262 change was supported at all five sites investigated (Tehraniifar et al. 2018; Rauschert  
263 et al. 2019; Rotroff et al. 2016). We suggest that further investigation in a larger  
264 cohort may lead to nominal significance at the sites in *CYP1A1*, *CNTNAP2*, and  
265 *GFI1*.

266

267 **Identification of *in utero* exposure-related differentially methylated CpG sites**  
268 **that are specific to individuals with high CP scores**

269 Epidemiological data suggests that there is an increased association between *in*  
270 *utero* tobacco exposure and behavioural disorder in children and adolescents (Carter  
271 et al. 2008; Mick et al. 2002). Thus, here, we investigated DNA methylation changes  
272 induced by *in utero* tobacco exposure as a potential molecular mechanism of  
273 dysfunction that could link the phenotypic trait of CP to maternal tobacco use during  
274 pregnancy. We therefore analysed DNA methylation patterns within our gene panel  
275 in response to *in utero* tobacco exposure and its interaction with CP status. A total of  
276 10 CpG sites in seven genes were found to display nominal significance in DNA  
277 methylation in response to *in utero* tobacco exposure and CP in this cohort (Table 4).

278 In the 10 CpG sites we identified under the interaction, *CYP1A1* showed greater  
279 magnitude differential methylation in high CP scores (exposed *in utero* vs. non-  
280 exposed with high CPS), with reduced reversed or no evidence of differential  
281 methylation at the same sites with low CP score. This indicates that within the  
282 observed nominal methylation changes the interaction was being driven in the high  
283 CP score group. One gene (*ASH2L*), contained three nominally significantly  
284 differentially methylated CpG sites, and *CYP1A1* and *MEF2C* both had two.

285 *CYP1A1* (Cytochrome P450 family 1 subfamily A member 1) is a well-established  
286 marker for *in utero* tobacco smoke exposure (Richmond et al. 2018; Lee Ken et al.  
287 2015; Richmond et al. 2014; Tehranifar et al. 2018). Neither of the two sites we  
288 observed under the interaction have probes at these locations on the Illumina array  
289 system, thus emphasising a benefit of amplicon sequencing compared to an array-  
290 based method. Variant differences in *CYP1A1* have previously been associated with  
291 child behavioural problems at age 2, from prenatal maternal environmental tobacco  
292 smoke (Hsieh et al. 2010). This highlights the need for this gene to be further  
293 investigated for its role in the development of conduct problems following *in utero*  
294 tobacco exposure.

295 Three CpG sites from the gene *ASH2L* (ASH2 like histone lysine methyltransferase  
296 complex subunit) showed in consistent levels of differential methylation in response  
297 to *in utero* tobacco exposure and CP, with two displaying hyper- and one  
298 hypomethylation. *ASH2L* has been found to interact with *MEF2C* (Myocyte enhancer

299 factor 2C) to mediate changes in histone 3 lysine 4 trimethylation (H3K4me3) (Jung  
300 et al.). Here, we detected nominal significance at two CpG sites within *MEF2C* (chr5,  
301 88179596 and 88179541). Both of these sites were associated with a greater level of  
302 hypomethylation in participants who were exposed to tobacco *in utero* with high CP  
303 scores in this cohort, although not at the FDR significance level. *MEF2C* plays a role  
304 in neural crest formation during development, where tissue-specific inactivation of  
305 the gene results in embryonic lethality (Verzi et al. 2007). Further, *MEF2* interacts  
306 with oxytocin, which is affiliated with prosocial behaviours (Kosfeld et al. 2005; Zak,  
307 Stanton, and Ahmadi 2007). Alterations to oxytocin have been shown to change the  
308 morphology of neurons via *MEF2A* (Meyer et al. 2018; Meyer et al. 2020). Functional  
309 roles of the gene in relation to early neuronal development still remain unclear,  
310 however it is thought to play a crucial role (Harrington et al. 2016). Recent research  
311 in animal models suggests that nicotine-dependent induction of the *ASH2L* and  
312 *MEF2C* complex during development induces alterations that could lead to  
313 fundamental changes in the brain (Jung et al.).

314 While we cannot assert causality, our targeted approach shows that *in utero* tobacco  
315 exposure may be altering methylation at CpG sites associated with neural  
316 phenotypes which persist into adulthood and are then associated with increased risk  
317 of high CP.

318

## 319 **Conclusion**

320 Here we have presented preliminary data to suggest that the association between  
321 maternal tobacco use during pregnancy and the development of CP in children and  
322 adolescents may in part be mediated by altered DNA methylation, induced by *in*  
323 *utero* tobacco exposure during development, at genes that have roles in *in utero*  
324 brain development and CP phenotypes. We acknowledge the limitations of this  
325 study described above, however, the data presented here are suggestive of a role  
326 for DNA methylation in the link between *in utero* tobacco exposure and offspring CP.  
327 Our findings should stimulate further study using larger sample sizes.

## 328 **Abbreviations**

329 CP Conduct problems

330 CHDS Christchurch health and development study  
331 BSAS Bisulfite based amplicon sequencing  
332 SIDS Sudden infant death syndrome  
333 ADHD Attention-deficit hyperactivity disorder  
334 DOHaD Developmental origins of human health and disease  
335 GFI1 Growth Factor Independent one transcriptional repressor  
336 CPS Conduct disorder score  
337 AHRR Aryl hydrocarbon receptor repressor  
338 ASH2L ASH2 like histone lysine methyltransferase complex subunit  
339 BDNF Brain-derived neurotrophic factor,  
340 CNTNAP2 Contactin associated protein 2  
341 CYP1A1 Cytochrome P450 Family 1 Subfamily A Member 1  
342 DUSP6 Dual specificity phosphatase 6  
343 GRIN2b Glutamate Ionotropic Receptor NMDA Type Subunit 2B  
344 MEF2C Myocyte enhancer factor 2C  
345 PRDM8 PR/SET Domain 8  
346 FC Fold change  
347 CPM Counts per million  
348 FDR False discovery rate

349

### 350 **Funding**

351 Funding for this study came from the Maurice and Phyllis Paykel Trust. CHDS was  
352 funded by the Health Research Council of New Zealand (Programme Grant 16/600).  
353 CMRF supplied funding for the manuscript to be written.

### 354 **Availability of data**

355 Upon request.

### 356 **Contributions**

357 AJN-molecular lab work, data analysis, and major contributor to manuscript. JFP-  
358 study design, data analysis, and major contributor to manuscript. ADN- data

359 analysis. JMB and LJH study design, provided DNA samples via CHDS. MAK- study  
360 design and over view. AJO- study design, molecular lab work, major contributor to  
361 manuscript and source of funding. All authors read and approved the final  
362 manuscript.

363 **Acknowledgements**

364 Not applicable

365 **Ethics declarations**

366 All aspects of the study were approved by the Southern Health and Disability Ethics  
367 Committee, under application number CTB/04/11/234/AM10 “Collection of DNA in  
368 the Christchurch Health and Development Study”.

369 **Consent for publication**

370 Not applicable

371 **Competing interests**

372 The authors declare that they have no competing interests.

## 373 References

374

- 375 Acosta, Maria Teresa, Mauricio Arcos-Burgos, and Maximilian Muenke. 2004. 'Attention  
376 deficit/hyperactivity disorder (ADHD): Complex phenotype, simple genotype?', *Genetics in*  
377 *Medicine*, 6: 1-15.
- 378 Beaver, Kevin M., John Paul Wright, Matt DeLisi, Anthony Walsh, Michael G. Vaughn, Danielle  
379 Boisvert, and Jamie Vaske. 2007. 'A gene  $\times$  gene interaction between DRD2 and DRD4 is  
380 associated with conduct disorder and antisocial behavior in males', *Behavioral and Brain*  
381 *Functions*, 3: 30.
- 382 Carter, Sarnia, Janis Paterson, Wanzhen Gao, and Leon Lusitini. 2008. 'Maternal smoking during  
383 pregnancy and behaviour problems in a birth cohort of 2-year-old Pacific children in New  
384 Zealand', *Early Human Development*, 84: 59-66.
- 385 Chen, Yunshun, Bhupinder Pal, Jane E. Visvader, and Gordon K. Smyth. 2017. 'Differential  
386 methylation analysis of reduced representation bisulfite sequencing experiments using  
387 edgeR', *F1000Res*, 6: 2055-55.
- 388 Conners, C. Keith. 1969. 'A teacher rating scale for use in drug studies with children', *The American*  
389 *Journal of Psychiatry*, 126: 884-88.
- 390 ———. 1970. 'Symptom patterns in hyperkinetic, neurotic, and normal children', *Child development*,  
391 41: 667-82.
- 392 Cox, Murray P., Daniel A. Peterson, and Patrick J. Biggs. 2010. 'SolexaQA: At-a-glance quality  
393 assessment of Illumina second-generation sequencing data', *BMC Bioinformatics*, 11: 485.
- 394 de Vocht, Frank, Andrew J Simpkin, Rebecca C Richmond, Caroline Relton, and Kate Tilling. 2015.  
395 'Assessment of offspring DNA methylation across the lifecourse associated with prenatal  
396 maternal smoking using Bayesian Mixture Modelling', *International journal of environmental*  
397 *research and public health*, 12: 14461-76.
- 398 Demontis, Ditte, Raymond K Walters, Joanna Martin, Manuel Mattheisen, Thomas Damm Als, Esben  
399 Agerbo, Rich Belliveau, Jonas Bybjerg-Grauholm, Marie Bækved-Hansen, and Felecia Cerrato.  
400 2017. 'Discovery of the first genome-wide significant risk loci for ADHD', *bioRxiv*: 145581.
- 401 Fergusson, D. M., L. J. Horwood, and M. Lloyd. 1991. 'Confirmatory factor models of attention deficit  
402 and conduct disorder', *Journal of child psychology and psychiatry, and allied disciplines*, 32:  
403 257-74.
- 404 Fergusson, D. M., L. J. Horwood, and E. M. Ridder. 2005. 'Show me the child at seven: the  
405 consequences of conduct problems in childhood for psychosocial functioning in adulthood',  
406 *Journal of child psychology and psychiatry, and allied disciplines*, 46: 837-49.
- 407 Harrington, Adam J., Aram Raissi, Kacey Rajkovich, Stefano Berto, Jaswinder Kumar, Gemma  
408 Molinaro, Jonathan Raduazzo, Yuhong Guo, Kris Loerwald, Genevieve Konopka, Kimberly M.  
409 Huber, and Christopher W. Cowan. 2016. 'MEF2C regulates cortical inhibitory and excitatory  
410 synapses and behaviors relevant to neurodevelopmental disorders', *eLife*, 5: e20059.
- 411 Hsieh, Chia-Jung, Suh-Fang Jeng, Yi-Ning Su, Hua-Fang Liao, Wu-Shiun Hsieh, Kuen-Yuh Wu, and Pau-  
412 Chung Chen. 2010. 'CYP1A1 Modifies the Effect of Maternal Exposure to Environmental  
413 Tobacco Smoke on Child Behavior', *Nicotine & Tobacco Research*, 12: 1108-17.
- 414 Jiao, S. S., L. L. Shen, C. Zhu, X. L. Bu, Y. H. Liu, C. H. Liu, X. Q. Yao, L. L. Zhang, H. D. Zhou, D. G.  
415 Walker, J. Tan, J. Götz, X. F. Zhou, and Y. J. Wang. 'Brain-derived neurotrophic factor protects  
416 against tau-related neurodegeneration of Alzheimer's disease'.
- 417 Joelsson, Petteri, Roshan Chudal, Ardesheer Talati, Auli Suominen, Alan S. Brown, and Andre  
418 Sourander. 2016. 'Prenatal smoking exposure and neuropsychiatric comorbidity of ADHD: a  
419 finnish nationwide population-based cohort study', *BMC Psychiatry*, 16: 306.
- 420 Joubert, B. R., J. F. Felix, P. Yousefi, K. M. Bakulski, A. C. Just, C. Breton, S. E. Reese, C. A. Markunas,  
421 R. C. Richmond, C. J. Xu, L. K. Kupers, S. S. Oh, C. Hoyo, O. Gruzjeva, C. Soderhall, L. A. Salas,  
422 N. Baiz, H. Zhang, J. Lepeule, C. Ruiz, S. Ligthart, T. Wang, J. A. Taylor, L. Duijts, G. C. Sharp, S.

- 423 A. Jankipersadsing, R. M. Nilsen, A. Vaez, M. D. Fallin, D. Hu, A. A. Litonjua, B. F. Fuemmeler,  
424 K. Huen, J. Kere, I. Kull, M. C. Munthe-Kaas, U. Gehring, M. Bustamante, M. J. Saurel-  
425 Coubizolles, B. M. Quraishi, J. Ren, J. Tost, J. R. Gonzalez, M. J. Peters, S. E. Haberg, Z. Xu, J. B.  
426 van Meurs, T. R. Gaunt, M. Kerkhof, E. Corpeleijn, A. P. Feinberg, C. Eng, A. A. Baccarelli, S. E.  
427 Benjamin Neelon, A. Bradman, S. K. Merid, A. Bergstrom, Z. Herceg, H. Hernandez-Vargas, B.  
428 Brunekreef, M. Pinart, B. Heude, S. Ewart, J. Yao, N. Lemonnier, O. H. Franco, M. C. Wu, A.  
429 Hofman, W. McArdle, P. Van der Vlies, F. Falahi, M. W. Gillman, L. F. Barcellos, A. Kumar, M.  
430 Wickman, S. Guerra, M. A. Charles, J. Holloway, C. Auffray, H. W. Tiemeier, G. D. Smith, D.  
431 Postma, M. F. Hivert, B. Eskenazi, M. Vrijheid, H. Arshad, J. M. Anto, A. Dehghan, W.  
432 Karmaus, I. Annesi-Maesano, J. Sunyer, A. Ghantous, G. Pershagen, N. Holland, S. K. Murphy,  
433 D. L. DeMeo, E. G. Burchard, C. Ladd-Acosta, H. Snieder, W. Nystad, G. H. Koppelman, C. L.  
434 Relton, V. W. Jaddoe, A. Wilcox, E. Melen, and S. J. London. 2016. 'DNA Methylation in  
435 Newborns and Maternal Smoking in Pregnancy: Genome-wide Consortium Meta-analysis',  
436 *Am J Hum Genet*, 98: 680-96.
- 437 Joubert, B. R., S. E. Håberg, R. M. Nilsen, X. Wang, S. E. Vollset, S. K. Murphy, Z. Huang, C. Hoyo, Ø  
438 Midttun, L. A. Cupul-Uicab, P. M. Ueland, M. C. Wu, W. Nystad, D. A. Bell, S. D. Peddada, and  
439 S. J. London. 2012. '450K epigenome-wide scan identifies differential DNA methylation in  
440 newborns related to maternal smoking during pregnancy', *Environ Health Perspect*, 120:  
441 1425-31.
- 442 Joubert, B. R., S. E. Haberg, R. M. Nilsen, X. Wang, S. E. Vollset, S. K. Murphy, Z. Huang, C. Hoyo, O.  
443 Midttun, L. A. Cupul-Uicab, P. M. Ueland, M. C. Wu, W. Nystad, D. A. Bell, S. D. Peddada, and  
444 S. J. London. 2012. '450K epigenome-wide scan identifies differential DNA methylation in  
445 newborns related to maternal smoking during pregnancy', *Environ Health Perspect*, 120:  
446 1425-31.
- 447 Joubert, Bonnie R, Janine F Felix, Paul Yousefi, Kelly M Bakulski, Allan C Just, Carrie Breton, Sarah E  
448 Reese, Christina A Markunas, Rebecca C Richmond, and Cheng-Jian Xu. 2016. 'DNA  
449 methylation in newborns and maternal smoking in pregnancy: genome-wide consortium  
450 meta-analysis', *The American Journal of Human Genetics*, 98: 680-96.
- 451 Joubert, Bonnie R, Siri E Håberg, Roy M Nilsen, Xuting Wang, Stein E Vollset, Susan K Murphy,  
452 Zhiqing Huang, Cathrine Hoyo, Øivind Midttun, and Lea A Cupul-Uicab. 2012. '450K  
453 epigenome-wide scan identifies differential DNA methylation in newborns related to  
454 maternal smoking during pregnancy', *Environmental health perspectives*, 120: 1425.
- 455 Joubert Bonnie, R., E. Håberg Siri, M. Nilsen Roy, Xuting Wang, E. Vollset Stein, K. Murphy Susan,  
456 Zhiqing Huang, Cathrine Hoyo, Øivind Midttun, A. Cupul-Uicab Lea, M. Ueland Per, C. Wu  
457 Michael, Wenche Nystad, A. Bell Douglas, D. Peddada Shyamal, and J. London Stephanie.  
458 2012. '450K Epigenome-Wide Scan Identifies Differential DNA Methylation in Newborns  
459 Related to Maternal Smoking during Pregnancy', *Environmental Health Perspectives*, 120:  
460 1425-31.
- 461 Jung, Yonwoo, Lawrence S. Hsieh, Angela M. Lee, Zhifeng Zhou, Daniel Coman, Christopher J. Heath,  
462 Fahmeed Hyder, Yann S. Mineur, Qiaoping Yuan, David Goldman, Angelique Bordey, and  
463 Marina R. Picciotto. 'An epigenetic mechanism mediates developmental nicotine effects on  
464 neuronal structure and behavior'.
- 465 Kosfeld, Michael, Markus Heinrichs, Paul J. Zak, Urs Fischbacher, and Ernst Fehr. 2005. 'Oxytocin  
466 increases trust in humans', *Nature*, 435: 673-76.
- 467 Krueger, Felix, and Simon R. Andrews. 2011. 'Bismark: a flexible aligner and methylation caller for  
468 Bisulfite-Seq applications', *Bioinformatics*, 27: 1571-72.
- 469 Lantz, Paula M., James S. House, James M. Lepkowski, David R. Williams, Richard P. Mero, and  
470 Jieming Chen. 1998. 'Socioeconomic Factors, Health Behaviors, and Mortality Results From a  
471 Nationally Representative Prospective Study of US Adults', *JAMA*, 279: 1703-08.
- 472 Lee Ken, W. K., Rebecca Richmond, Pingzhao Hu, Leon French, Jean Shin, Celine Bourdon, Eva  
473 Reischl, Melanie Waldenberger, Sonja Zeilinger, Tom Gaunt, Wendy McArdle, Susan Ring,

- 474 Geoff Woodward, Luigi Bouchard, Daniel Gaudet, Davey Smith George, Caroline Relton,  
475 Tomas Paus, and Zdenka Pausova. 2015. 'Prenatal Exposure to Maternal Cigarette Smoking  
476 and DNA Methylation: Epigenome-Wide Association in a Discovery Sample of Adolescents  
477 and Replication in an Independent Cohort at Birth through 17 Years of Age', *Environmental  
478 Health Perspectives*, 123: 193-99.
- 479 Li, Liang, Xiangbin Ruan, Chang Wen, Pan Chen, Wei Liu, Liyuan Zhu, Pan Xiang, Xiaoling Zhang,  
480 Qunfang Wei, Lin Hou, Bin Yin, Jiengang Yuan, Boqin Qiang, Pengcheng Shu, and Xiaozhong  
481 Peng.
- 482 Meyer, M., I. Berger, J. Winter, and B. Jurek. 2018. 'Oxytocin alters the morphology of hypothalamic  
483 neurons via the transcription factor myocyte enhancer factor 2A (MEF-2A)', *Mol Cell  
484 Endocrinol*, 477: 156-62.
- 485 Meyer, Magdalena, Kerstin Kuffner, Julia Winter, Inga D. Neumann, Christian H. Wetzel, and  
486 Benjamin Jurek. 2020. 'Myocyte Enhancer Factor 2A (MEF2A) Defines Oxytocin-Induced  
487 Morphological Effects and Regulates Mitochondrial Function in Neurons', *International  
488 Journal of Molecular Sciences*, 21: 2200.
- 489 Mick, Eric, Joseph Biederman, Stephen V. Faraone, Julie Sayer, and Seth Kleinman. 2002. 'Case-  
490 Control Study of Attention-Deficit Hyperactivity Disorder and Maternal Smoking, Alcohol  
491 Use, and Drug Use During Pregnancy', *Journal of the American Academy of Child &  
492 Adolescent Psychiatry*, 41: 378-85.
- 493 Noble, Alexandra J, John F Pearson, Joseph M Boden, L. John Horwood, Martin A Kennedy, and Amy J  
494 Osborne. 2021. 'Hypomethylation in FASTKD1 detected in the association between in utero  
495 tobacco exposure and conduct problem in a New Zealand longitudinal study':  
496 2021.04.08.438710.
- 497 Noble, Alexandra, John Pearson, Joseph Boden, John Horwood, Neil Gemmell, Martin Kennedy, and  
498 Amy Osborne. 2020. 'A validation of Illumina EPIC array system with bisulfite-based  
499 amplicon sequencing', *bioRxiv*: 2020.05.25.115428.
- 500 Rauschert, Sebastian, Phillip E. Melton, Graham Burdge, Jeffrey M. Craig, Keith M. Godfrey, Joanna  
501 D. Holbrook, Karen Lillycrop, Trevor A. Mori, Lawrence J. Beilin, Wendy H. Oddy, Craig  
502 Pennell, and Rae-Chi Huang. 2019. 'Maternal Smoking During Pregnancy Induces Persistent  
503 Epigenetic Changes Into Adolescence, Independent of Postnatal Smoke Exposure and Is  
504 Associated With Cardiometabolic Risk', *Frontiers in genetics*, 10: 770-70.
- 505 Richmond, R. C., A. J. Simpkin, G. Woodward, T. R. Gaunt, O. Lyttleton, W. L. McArdle, S. M. Ring,  
506 Adac Smith, N. J. Timpson, K. Tilling, G. D. Smith, and C. L. Relton. 2015. 'Prenatal exposure  
507 to maternal smoking and offspring DNA methylation across the lifecourse: findings from the  
508 Avon Longitudinal Study of Parents and Children (ALSPAC)', *Human molecular genetics*, 24:  
509 2201-17.
- 510 Richmond, Rebecca C, Matthew Suderman, Ryan Langdon, Caroline L Relton, and George Davey  
511 Smith. 2018. 'DNA methylation as a marker for prenatal smoke exposure in adults',  
512 *International Journal of Epidemiology*, 47: 1120-30.
- 513 Richmond, Rebecca C., Andrew J. Simpkin, Geoff Woodward, Tom R. Gaunt, Oliver Lyttleton, Wendy  
514 L. McArdle, Susan M. Ring, Andrew D. A. C. Smith, Nicholas J. Timpson, Kate Tilling, George  
515 Davey Smith, and Caroline L. Relton. 2015. 'Prenatal exposure to maternal smoking and  
516 offspring DNA methylation across the lifecourse: findings from the Avon Longitudinal Study  
517 of Parents and Children (ALSPAC)', *Human molecular genetics*, 24: 2201-17.
- 518 Richmond, Rebecca C., Andrew J. Simpkin, Geoff Woodward, Tom R. Gaunt, Oliver Lyttleton, Wendy  
519 L. McArdle, Susan M. Ring, Andrew D.A.C. Smith, Nicholas J. Timpson, Kate Tilling, George  
520 Davey Smith, and Caroline L. Relton. 2014. 'Prenatal exposure to maternal smoking and  
521 offspring DNA methylation across the lifecourse: findings from the Avon Longitudinal Study  
522 of Parents and Children (ALSPAC)', *Human Molecular Genetics*, 24: 2201-17.
- 523 Riva, Valentina, Marco Battaglia, Maria Nobile, Francesca Cattaneo, Claudio Lazazzera, Sara  
524 Mascheretti, Roberto Giorda, Chantal Mérette, Claudia Émond, and Michel Maziade. 2015.

- 525 'GRIN2B predicts attention problems among disadvantaged children', *European child &*  
526 *adolescent psychiatry*, 24: 827-36.
- 527 Rotroff, Daniel M, Bonnie R Joubert, Skylar W Marvel, Siri E Häberg, Michael C Wu, Roy M Nilsen, Per  
528 M Ueland, Wenche Nystad, Stephanie J London, and Alison Motsinger-Reif. 2016. 'Maternal  
529 smoking impacts key biological pathways in newborns through epigenetic modification in  
530 Utero', *BMC genomics*, 17: 976.
- 531 Rutter M, Tizard J, Whitmore K. 1970. 'Education, Health and Behaviour', *London: Longmans*.
- 532 Rzehak, Peter, Richard Saffery, Eva Reischl, Marcela Covic, Simone Wahl, Veit Grote, Annick  
533 Xhonneux, Jean-Paul Langhendries, Natalia Ferre, Ricardo Closa-Monasterolo, Elvira Verduci,  
534 Enrica Riva, Piotr Socha, Dariusz Grusfeld, Berthold Koletzko, and group European  
535 Childhood Obesity Trial Study. 2016. 'Maternal Smoking during Pregnancy and DNA-  
536 Methylation in Children at Age 5.5 Years: Epigenome-Wide-Analysis in the European  
537 Childhood Obesity Project (CHOP)-Study', *PLOS ONE*, 11: e0155554.
- 538 Salvatore, Jessica E., and Danielle M. Dick. 2018. 'Genetic influences on conduct disorder',  
539 *Neuroscience & Biobehavioral Reviews*, 91: 91-101.
- 540 Sengupta, Sarojini M., Alicia K. Smith, Natalie Grizenko, and Ridha Joobar. 2017. 'Locus-specific DNA  
541 methylation changes and phenotypic variability in children with attention-deficit  
542 hyperactivity disorder', *Psychiatry Research*, 256: 298-304.
- 543 Skogstrand, Kristin, Christian Munch Hagen, Nis Borbye-Lorenzen, Michael Christiansen, Jonas  
544 Bybjerg-Grauholm, Marie Bækvad-Hansen, Thomas Werge, Anders Børghlum, Ole Mors,  
545 Merethe Nordentoft, Preben Bo Mortensen, and David Michael Hougaard. 'Reduced  
546 neonatal brain-derived neurotrophic factor is associated with autism spectrum disorders'.
- 547 Suter, Melissa, Adi Abramovici, Lori Showalter, Min Hu, Cynthia Do Shope, Michael Varner, and  
548 Kjersti Aagaard-Tillery. 2010. 'In utero tobacco exposure epigenetically modifies placental  
549 CYP1A1 expression', *Metabolism-Clinical and Experimental*, 59: 1481-90.
- 550 Tehranifar, Parisa, Hui-Chen Wu, Jasmine A. McDonald, Farzana Jasmine, Regina M. Santella, Irina  
551 Gurvich, Julie D. Flom, and Mary Beth Terry. 2018. 'Maternal cigarette smoking during  
552 pregnancy and offspring DNA methylation in midlife', *Epigenetics*, 13: 129-34.
- 553 van Otterdijk, Sanne D, Alexandra M Binder, and Karin B Michels. 2017. 'Locus-specific DNA  
554 methylation in the placenta is associated with levels of pro-inflammatory proteins in cord  
555 blood and they are both independently affected by maternal smoking during pregnancy',  
556 *Epigenetics*, 12: 875-85.
- 557 Verzi, Michael P., Pooja Agarwal, Courtney Brown, David J. McCulley, John J. Schwarz, and Brian L.  
558 Black. 2007. 'The Transcription Factor MEF2C Is Required for Craniofacial Development',  
559 *Developmental Cell*, 12: 645-52.
- 560 Wakschlag, L. S., B. B. Lahey, R. Loeber, S. M. Green, R. A. Gordon, and B. L. Leventhal. 1997.  
561 'Maternal smoking during pregnancy and the risk of conduct disorder in boys', *Arch Gen*  
562 *Psychiatry*, 54: 670-6.
- 563 Zak, Paul J., Angela A. Stanton, and Sheila Ahmadi. 2007. 'Oxytocin increases generosity in humans',  
564 *PLOS ONE*, 2: e1128-e28.

565

566

567

568

569

570

571

572 Table 1 - CHDS subsets selected for analysis. The range of conduct problem scores  
 573 in each category is indicated in brackets. A score of 53 or more is the top quartile for  
 574 CP, a score of 60 or more the top decile for CP.

|                                                        | Group 1                                   | Group 2                                      | Group 3                                       |
|--------------------------------------------------------|-------------------------------------------|----------------------------------------------|-----------------------------------------------|
|                                                        | Exposed <i>in utero</i> and never smokers | Exposed <i>in utero</i> and a regular smoker | Not exposed <i>in utero</i> and never smokers |
|                                                        | n= 32                                     | n= 32                                        | n= 32                                         |
| Sex                                                    |                                           |                                              |                                               |
| Male                                                   | 69%                                       | 72%                                          | 60%                                           |
| Female                                                 | 31%                                       | 28%                                          | 40%                                           |
| Tobacco smoking status at the time of blood collection |                                           |                                              |                                               |
| Never                                                  | 100%                                      | 0%                                           | 100%                                          |
| Regular                                                | 0%                                        | 100%                                         | 0%                                            |
| Conduct problem score (CPS)                            |                                           |                                              |                                               |
| Low CPS (<46)                                          | n= 16 (42-46)                             | n= 16 (42-46)                                | n= 16 (41-43)                                 |
| High CPS (>53)                                         | n= 16 (53-75)                             | n= 16 (60-85)                                | n= 16 (53-68)                                 |

575

576

577

578

579

580

581

582

583

584

585

586

587

588

589

590

591 *Table 2 - Genes selected to investigate the link between in utero tobacco exposure*  
 592 *and CP.*

| <b>Gene</b>                                                                                                                                                                                                                                                                                         | <b>Function</b>                                                               | <b>Significance</b>                                                                                                 |
|-----------------------------------------------------------------------------------------------------------------------------------------------------------------------------------------------------------------------------------------------------------------------------------------------------|-------------------------------------------------------------------------------|---------------------------------------------------------------------------------------------------------------------|
| AHRR<br>(Joubert, Håberg, Nilsen, Wang, Vollset, Murphy, Huang, Hoyo, Middtun, and Cupul-Uicab 2012; Richmond, Simpkin, Woodward, Gaunt, Lyttleton, McArdle, Ring, Smith, Timpson, Tilling, Smith, et al. 2015; de Vocht et al. 2015; van Otterdijk, Binder, and Michels 2017; Rotroff et al. 2016) | Mediates toxicity of dioxin (found in cigarette smoke)                        | Hypomethylated in tobacco smokers and their offspring                                                               |
| ASH2L<br>(Li et al.)                                                                                                                                                                                                                                                                                | Histone lysine methyltransferase                                              | Associated with schizophrenia                                                                                       |
| BDNF<br>(Skogstrand et al. ; Jiao et al.)                                                                                                                                                                                                                                                           | Nerve growth factor                                                           | Promotes neuronal survival. Implicated in neurodegenerative disease                                                 |
| CNTNAP2<br>(Joubert, Felix, Yousefi, Bakulski, Just, Breton, Reese, Markunas, Richmond, and Xu 2016; Richmond, Simpkin, Woodward, Gaunt, Lyttleton, McArdle, Ring, Smith, Timpson, Tilling, Smith, et al. 2015; Rzehak et al. 2016)                                                                 | Neurexin family – functions in vertebrate nervous system                      | Implicated in schizophrenia, autism, ADHD, intellectual disability. Hypomethylated in offspring of maternal smoking |
| CYP1A1<br>(Suter et al. 2010; Rotroff et al. 2016; Joubert, Håberg, Nilsen, Wang, Vollset, Murphy, Huang, Hoyo, Middtun, and Cupul-Uicab 2012; Richmond, Simpkin, Woodward, Gaunt, Lyttleton, McArdle, Ring, Smith, Timpson, Tilling, Smith, et al. 2015;                                           | Monoxygenase – expression is induced by hydrocarbons found in cigarette smoke | Hypomethylated in offspring of maternal smoking                                                                     |

|                                                                                                                                                                    |                                                                                                                      |                                                                                                                            |
|--------------------------------------------------------------------------------------------------------------------------------------------------------------------|----------------------------------------------------------------------------------------------------------------------|----------------------------------------------------------------------------------------------------------------------------|
| de Vocht et al. 2015; van Otterdijk, Binder, and Michels 2017)<br>DUSP6<br>(Demontis et al. 2017)                                                                  | Protein phosphatase, cellular proliferation and differentiation                                                      | Regulates neurotransmitter homeostasis                                                                                     |
| GF11<br>(Rotroff et al. 2016; Joubert, Håberg, Nilsen, Wang, Vollset, Murphy, Huang, Hoyo, Middtun, and Cupul-Uicab 2012; van Otterdijk, Binder, and Michels 2017) | Zinc finger protein - transcriptional repressor                                                                      | Part of a complex that controls histone modifications and gene silencing. Hypermethylated in offspring of maternal smoking |
| GRIN2B<br>(Riva et al. 2015)                                                                                                                                       | Glutamate receptor – expressed early in the brain and is required for normal brain development                       | Mutations associated with autism, ADHD, schizophrenia                                                                      |
| MEF2C<br>(Demontis et al. 2017)                                                                                                                                    | MEF2C is associated with hippocampal-dependent learning and memory                                                   | MEF2C is crucial for normal neuronal development. Associated with ADHD                                                     |
| PRDM8<br>(Joubert, Felix, Yousefi, Bakulski, Just, Breton, Reese, Markunas, Richmond, and Xu 2016)                                                                 | Histone methyltransferase - Controls expression of genes involved in neural development and neuronal differentiation | Hypomethylated in offspring of maternal smoking                                                                            |

593

594

595

596

597

598

599

600

601

602 *Table 3* - Previously reported CpG sites showing differential DNA methylation in  
 603 response to *in utero* tobacco exposure, and their average methylation values in  
 604 individuals from this cohort.

| Gene | Illumina ID | Exposed <i>in</i> | Non- | $\beta$ difference | P value |
|------|-------------|-------------------|------|--------------------|---------|
|------|-------------|-------------------|------|--------------------|---------|

|                |            | <i>utero</i> $\beta$<br>value | exposed <i>in</i><br><i>utero</i> $\beta$<br>value |        |       |
|----------------|------------|-------------------------------|----------------------------------------------------|--------|-------|
| <i>AHRR</i>    | cg05575921 | 72.287                        | 75.448                                             | -3.161 | 0.022 |
| <i>CNTNAP2</i> | cg2594950  | 3.845                         | 3.860                                              | -0.014 | 0.991 |
| <i>CYP1A1</i>  | cg05549655 | 26.894                        | 21.699                                             | 5.195  | 0.425 |
| <i>GFI1</i>    | cg09935388 | 75.151                        | 75.330                                             | -0.582 | 0.055 |
| <i>GFI1</i>    | cg09662411 | 95.837                        | 97.400                                             | -1.583 | 0.274 |

605

606

607

608

609

610

611

612

613

614

615

616

617

618

619

620

621

622

623

624

625

626 *Table 4* - CpG sites where differential methylation between conduct problem scores  
 627 differs with *in utero* exposure at  $P < 0.05$ . Log Fold Change (FC) and P values  
 628 (unadjusted) from log ratio tests for the effect on normalized methylation ratios of: (1)  
 629 interaction between *in utero* exposure and Conduct Problem Score, (2) *In utero*  
 630 exposed - non-exposed contrast within Low CPS and (3) within High CPS

631 participants. Loci with nominally significant ( $P < 0.05$ ) interaction shown, all FDR  $P$   
632 values  $> 0.05$ .

633

| Gene          | CpG location    | Interaction <sup>(1)</sup> |         | Low CPS <sup>(2)</sup> |         | High CPS <sup>(3)</sup> |         |
|---------------|-----------------|----------------------------|---------|------------------------|---------|-------------------------|---------|
|               |                 | Log FC                     | P value | Log FC                 | P value | Log FC                  | P value |
| <i>CYP1A1</i> | Chr15, 75019290 | -2.013                     | 0.010   | 0.344                  | 0.493   | -1.669                  | 0.005   |
| <i>GFI1</i>   | Chr1, 92947705  | -0.957                     | 0.011   | 0.002                  | 0.992   | -0.955                  | 0.001   |
| <i>ASH2L</i>  | Chr8, 37962878  | 1.257                      | 0.024   | -0.447                 | 0.253   | 0.811                   | 0.042   |
| <i>MEF2C</i>  | Chr5, 88179596  | -1.679                     | 0.040   | 0.678                  | 0.174   | -1.000                  | 0.122   |
| <i>DUSP6</i>  | Chr12, 89746588 | -1.444                     | 0.041   | 0.864                  | 0.107   | -0.580                  | 0.204   |
| <i>ASH2L</i>  | Chr8, 37962657  | -0.199                     | 0.042   | 0.052                  | 0.455   | -0.147                  | 0.033   |
| <i>CYP1A1</i> | Chr15, 75019127 | -1.221                     | 0.045   | 0.403                  | 0.319   | -0.819                  | 0.072   |
| <i>ASH2L</i>  | Chr8, 37962901  | 1.250                      | 0.046   | -0.561                 | 0.205   | 0.688                   | 0.121   |
| <i>GRIN2b</i> | Chr12, 14133359 | 2.711                      | 0.048   | 0.121                  | 0.903   | 2.832                   | 0.004   |
| <i>MEF2C</i>  | Chr5, 88179541  | -1.336                     | 0.050   | 0.615                  | 0.139   | -0.720                  | 0.190   |

634
